# Supplementary material for: Impact of Xylella fastidiosa subspecies pauca in European olives
Source: PubMed Central journal article supplement — Proc Natl Acad Sci U S A. 2020 Apr 13;117(17):9250–9. doi: 10.1073/pnas.1912206117 (PMC7196823; doi:10.1073/pnas.1912206117), 2020-04-13
Supplement: pnas.1912206117.sapp.pdf [file pnas.1912206117.sapp.pdf]

1

## 2 **Supplementary Information for**

### 3 **Impact of *Xylella fastidiosa* subspecies *pauca* in European Olives**

4 **Schneider, van der Werf, Cendoya, Mourits, Navas-Cortes, Vicent, Oude Lansink**

5 **Kevin Schneider**

6 **E-mail: [kevin.schneider@wur.nl](mailto:kevin.schneider@wur.nl)**

#### 7 **This PDF file includes:**

8 Figs. S1 to S9

9 Tables S1 to S8

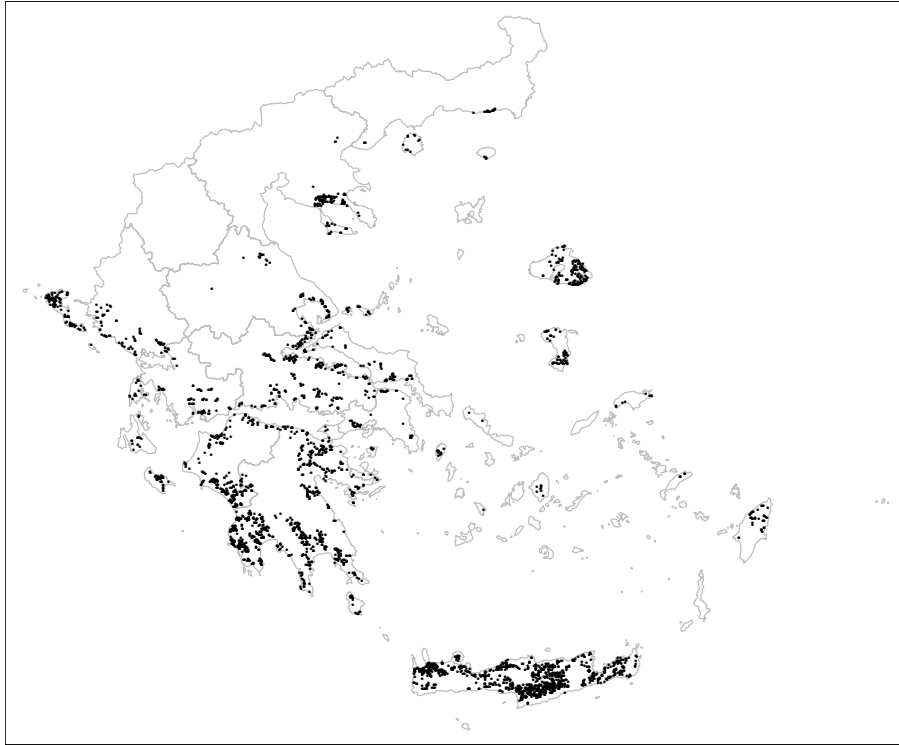

(a)

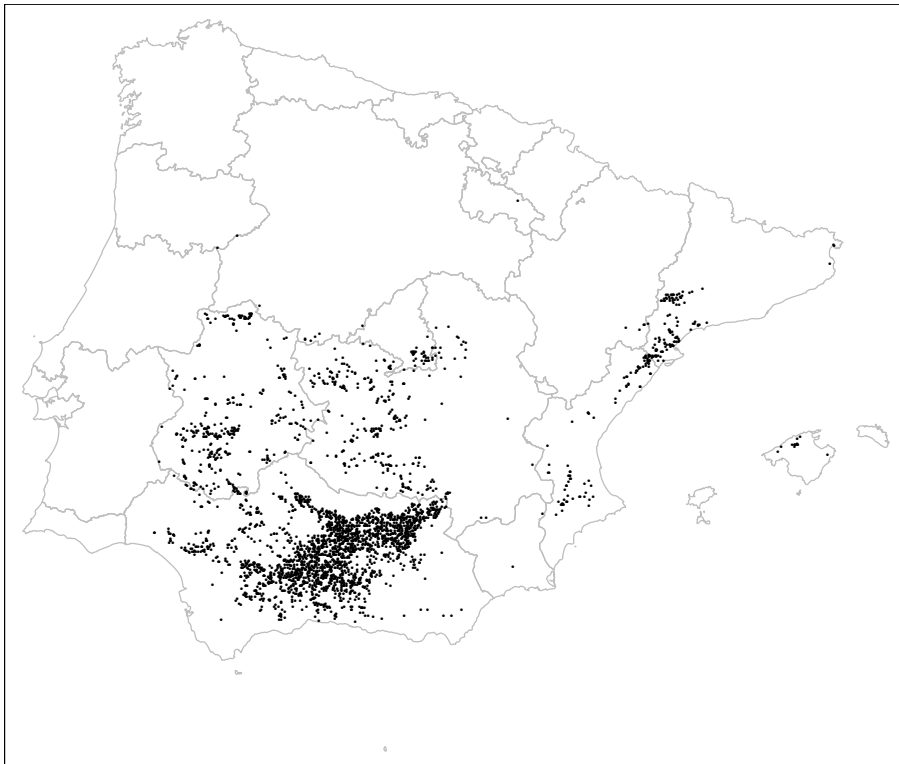

(b)

**Fig. S1.** All randomized points of introduction for Greece and Spain

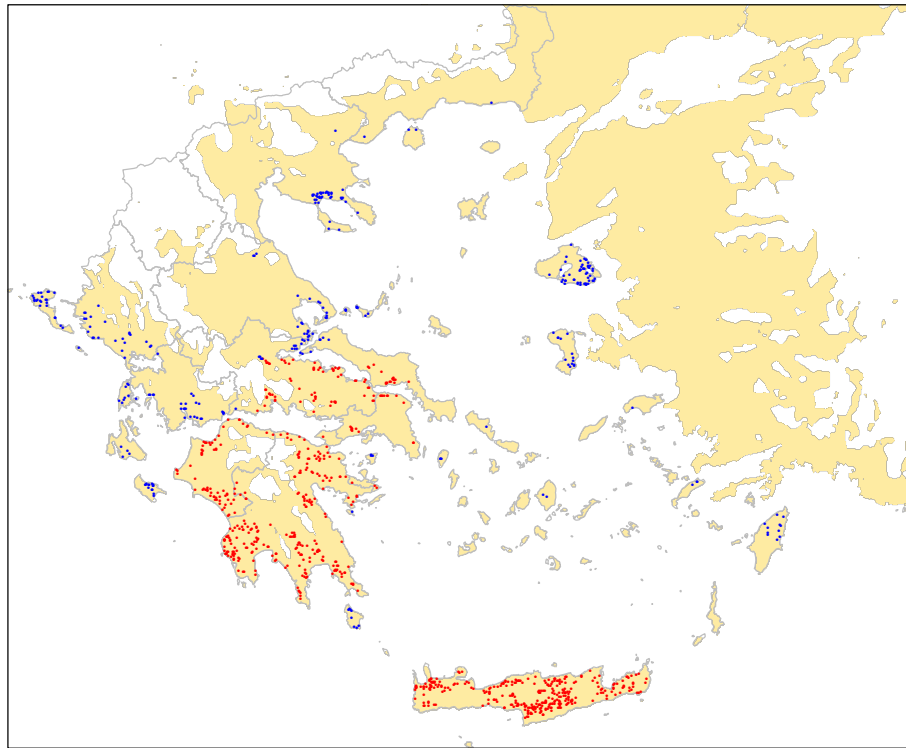

**Fig. S2.** Points of introduction which resulted in an infected area less than (blue) and more or equal to (red) 30 percent of the Greek area of production for the 5.18 km per year spread rate and a climatic suitability threshold of 0.132 (suitable area in yellow)

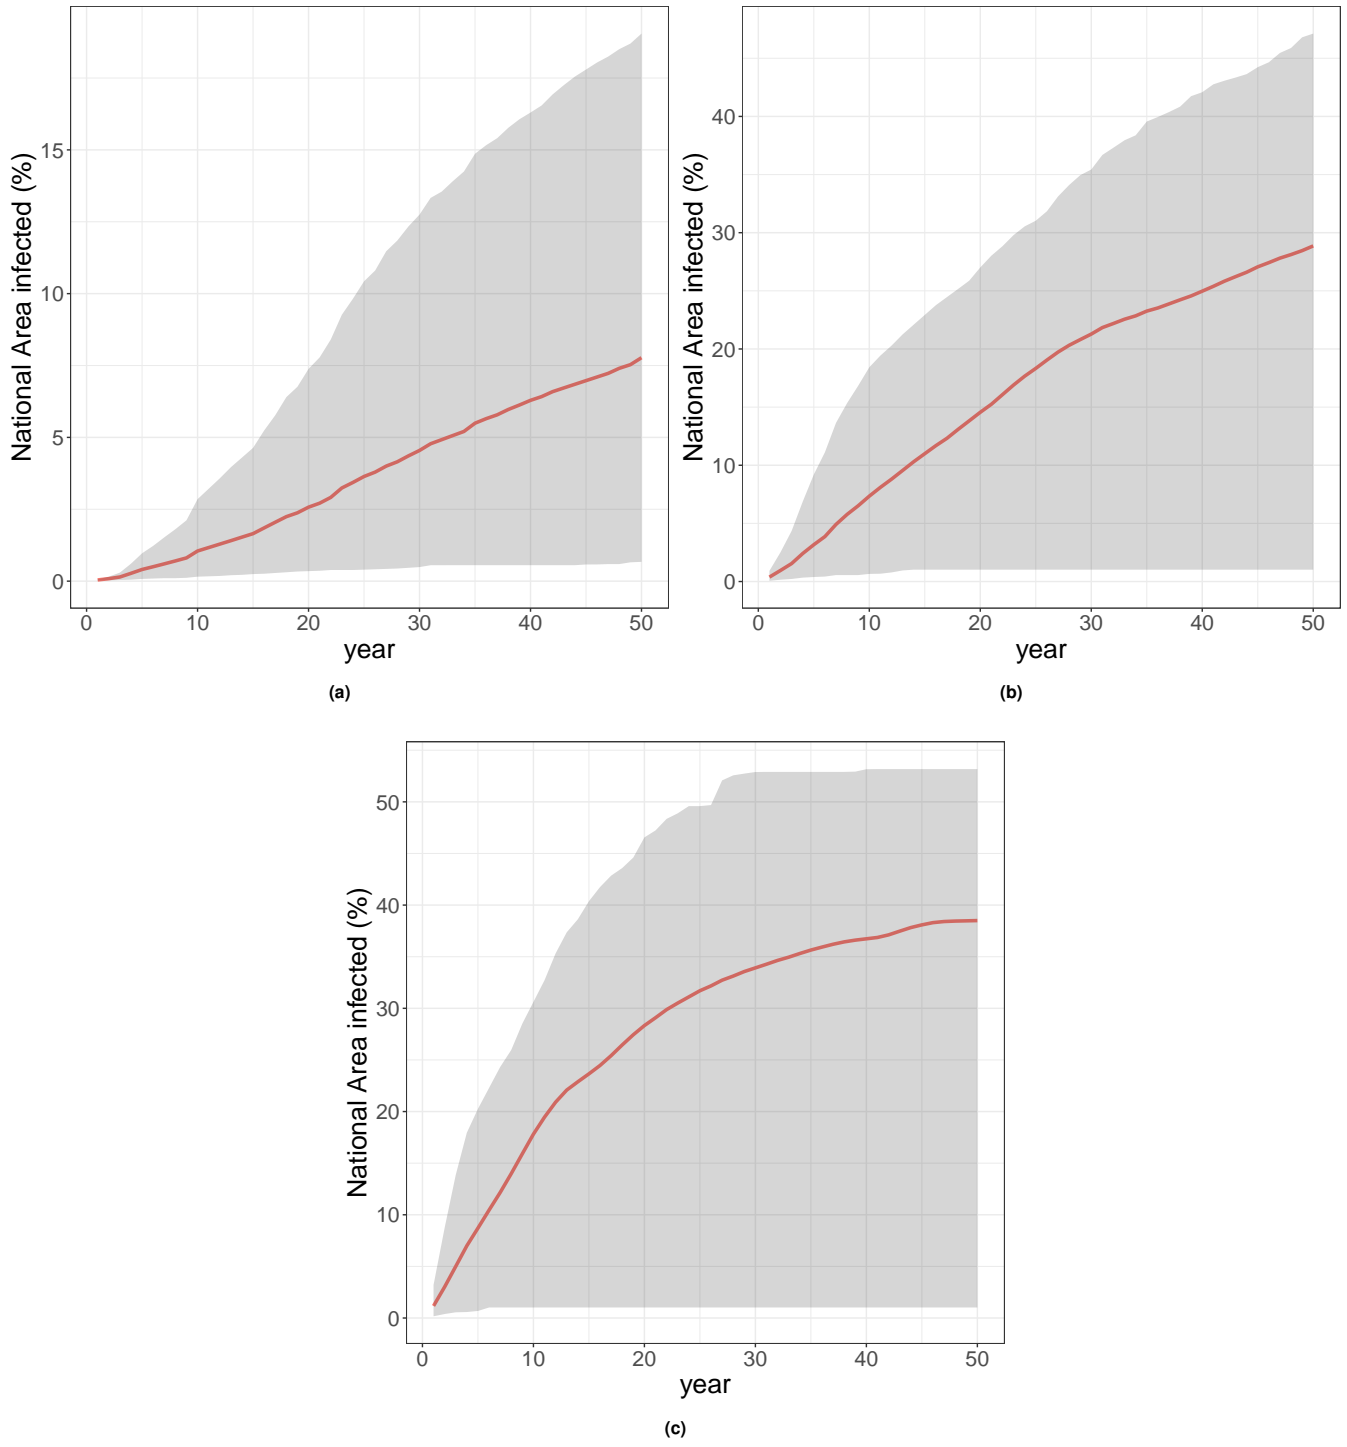

**Fig. S3.** Uncertainty of the Greek area of production infected over time for the 1.1 km (a), 5.18 km (b) and 12.35 km (c) per year spread rate and a climatic suitability threshold ( $T_2$ ) of 0.132. The mean of 1000 epidemics from 1000 random points of introduction is indicated in red. The grey area represents the 90 percent range (from the 5 to 95 percentile) of the 1000 simulated epidemics.

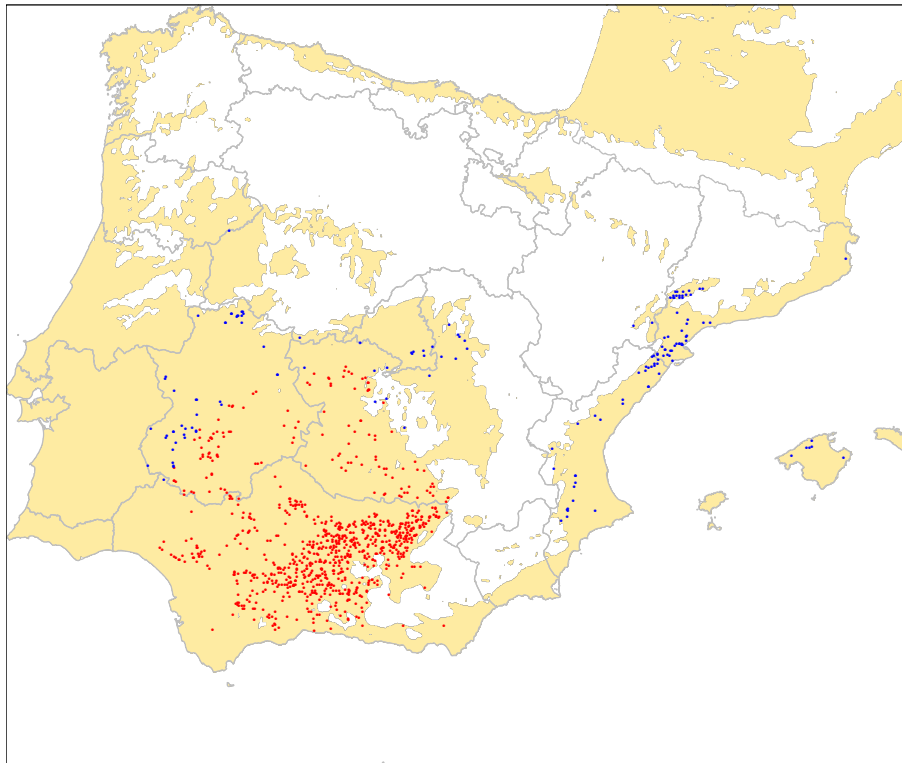

**Fig. S4.** Points of introduction which resulted in an infected area less than (blue) and more or equal to (red) 50 percent of the Spanish area of production for the 5.18 km per year spread rate and a climatic suitability threshold of 0.132 (suitable area in yellow)

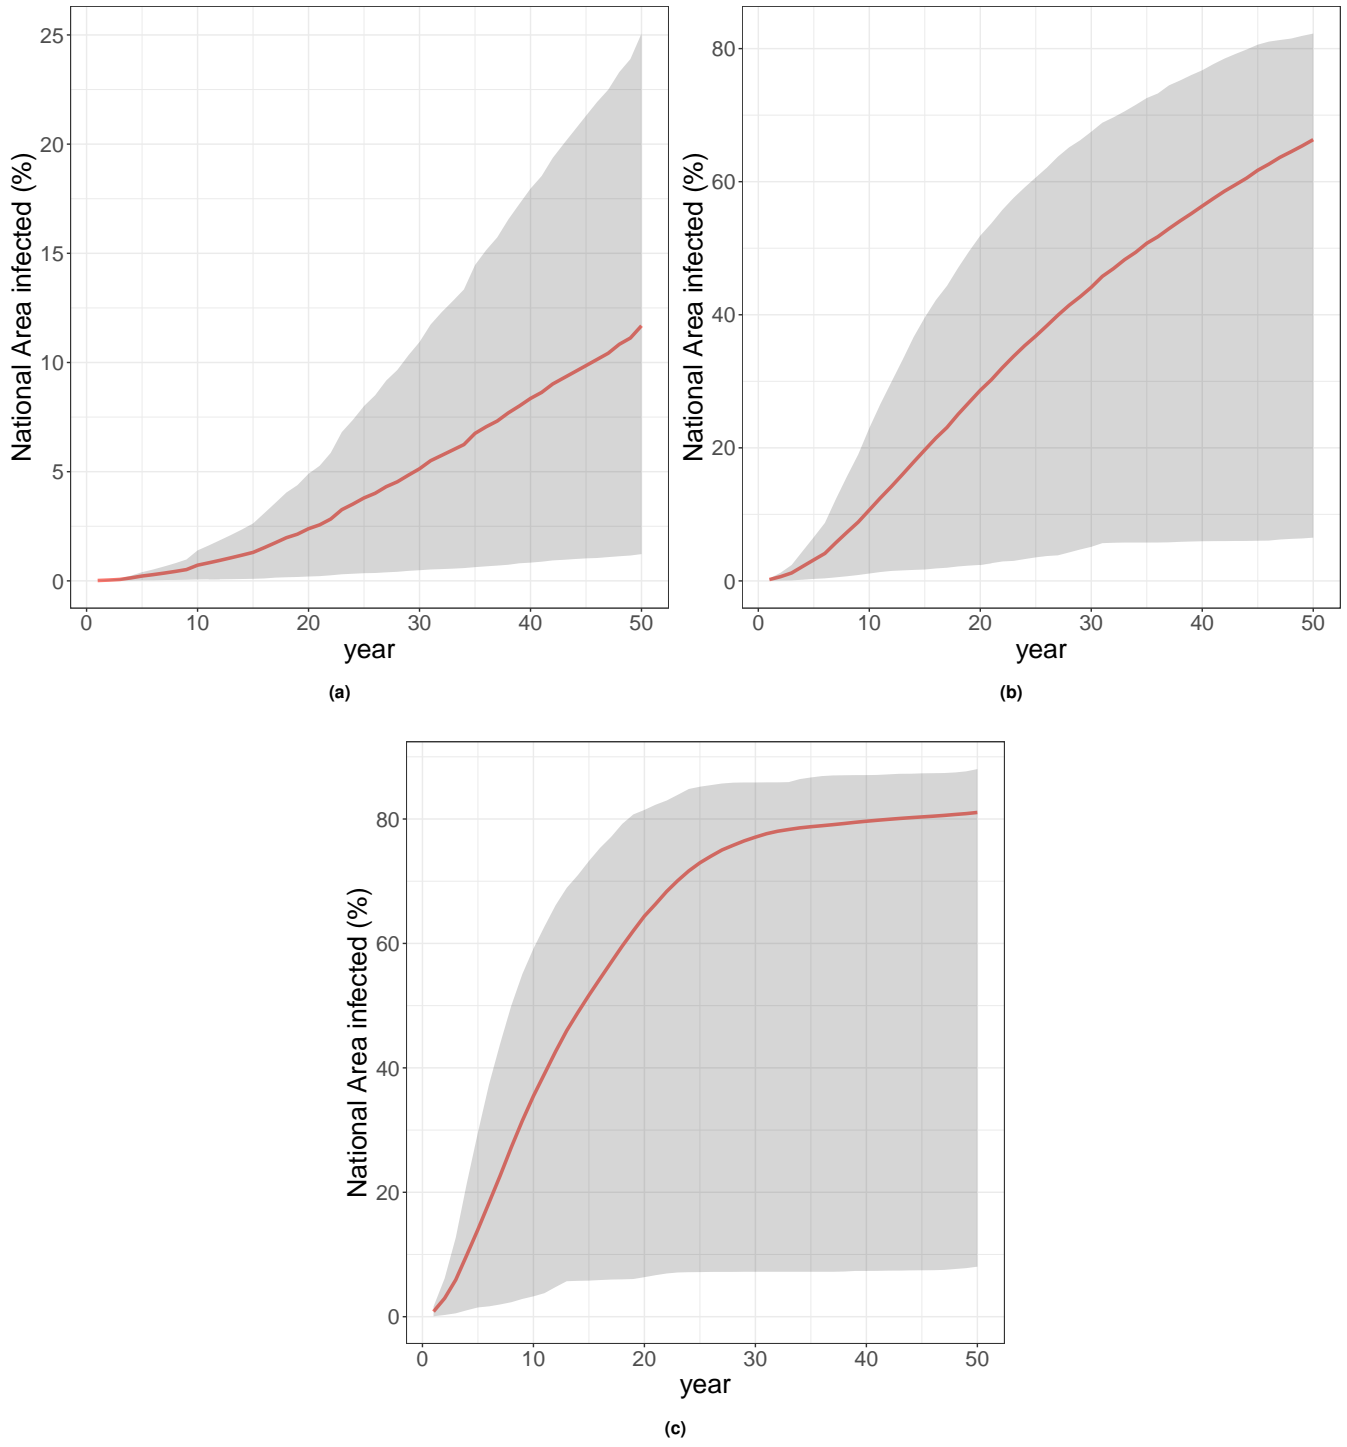

**Fig. S5.** Uncertainty of the Spanish area of production infected over time for the 1.1 km (a), 5.18 km (b) and 12.35 km (c) per year spread rate and a climatic suitability threshold ( $T_2$ ) of 0.132. The mean of 1000 epidemics from 1000 random points of introduction is indicated in red. The grey area represents the 90 percent range (from the 5 to 95 percentile) of the 1000 simulated epidemics.

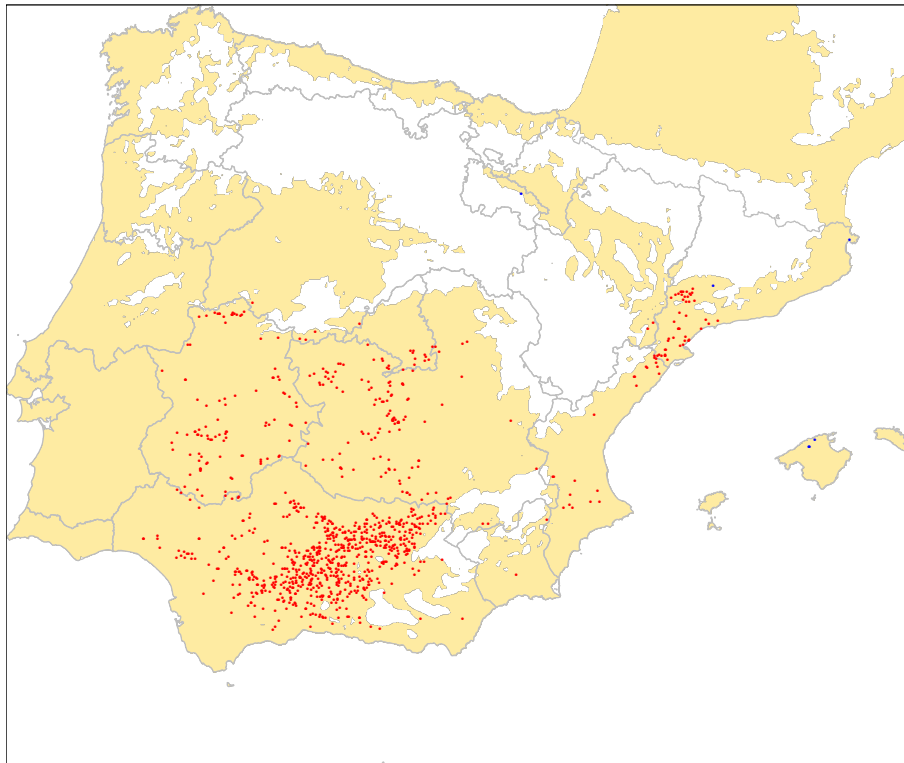

**Fig. S6.** Points of introduction which resulted in an infected area less than (blue) and more or equal to (red) 50 percent of the Spanish area of production for the 12.35 km per year spread rate and a climatic suitability threshold of 0.093 (suitable area in yellow)

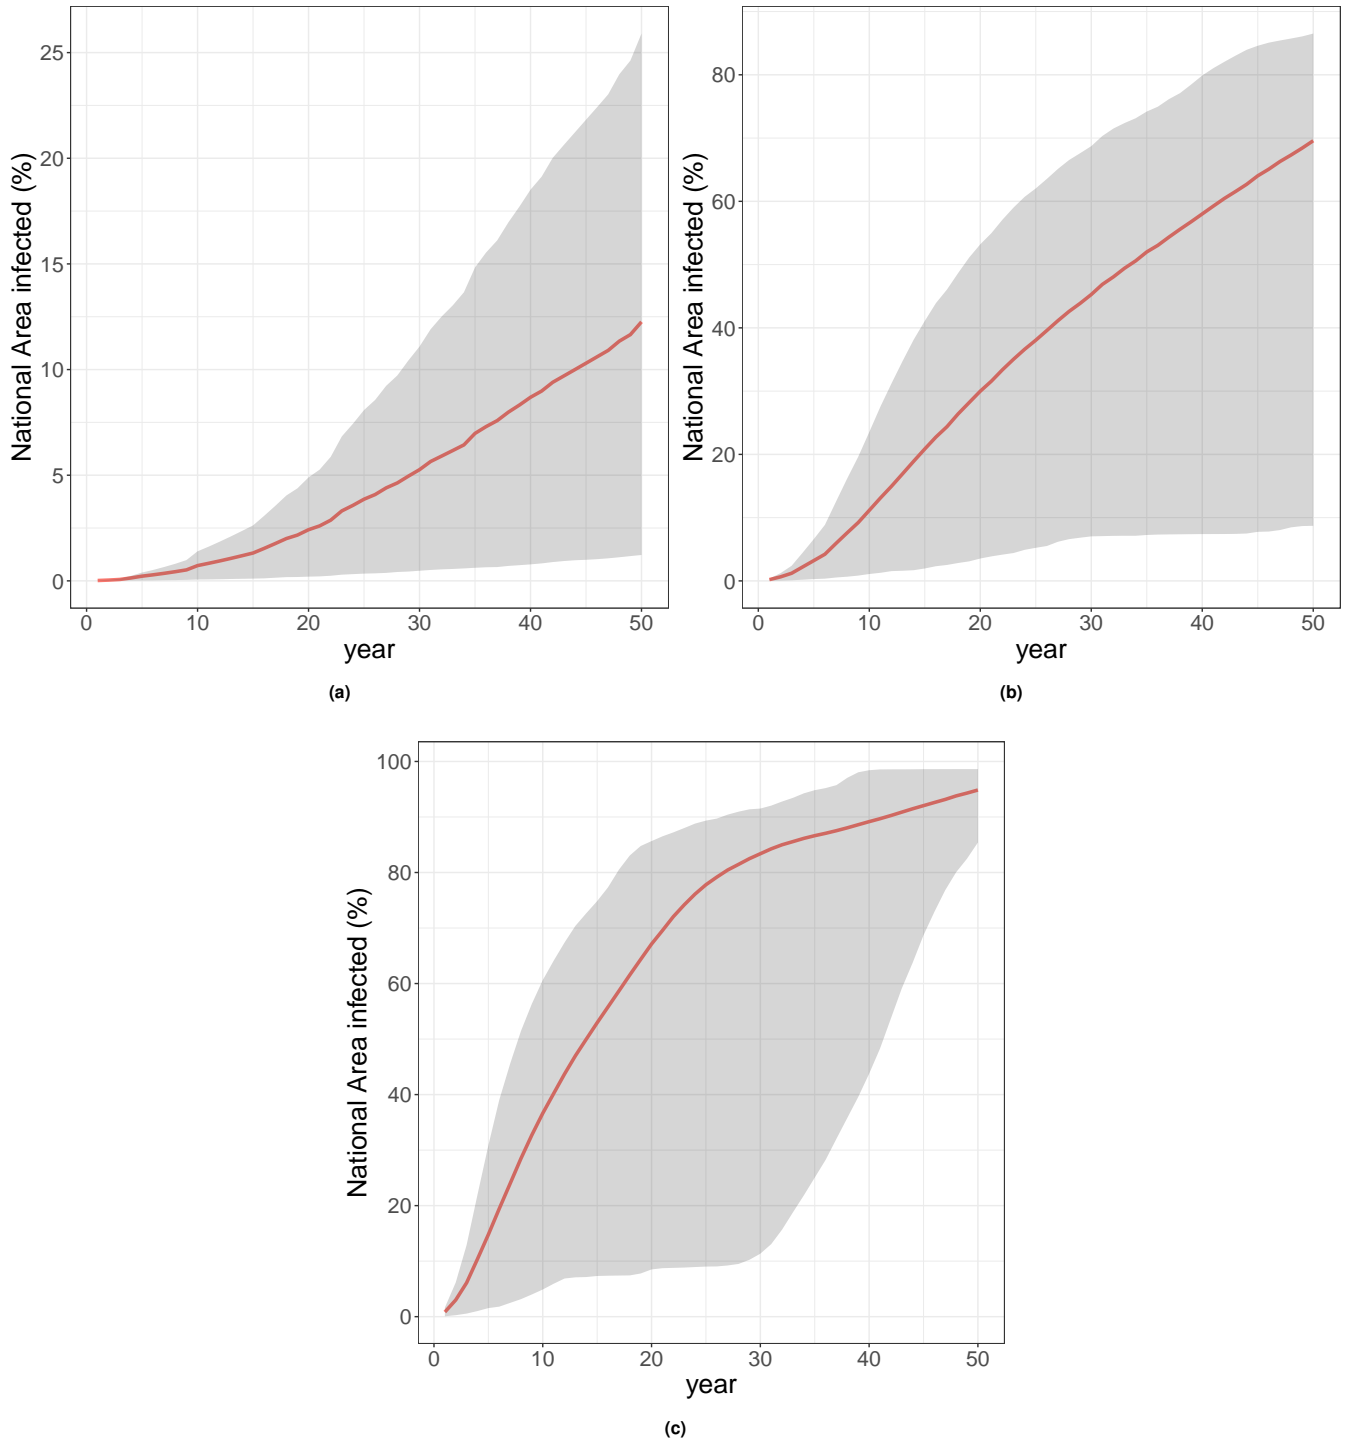

**Fig. S7.** Uncertainty of the Spanish area of production infected over time for the 1.1 km (a), 5.18 km (b) and 12.35 km (c) per year spread rate and a climatic suitability threshold (T3) of 0.093. The mean of 1000 epidemics from 1000 random points of introduction is indicated in red. The grey area represents the 90 percent range (from the 5 to 95 percentile) of the 1000 simulated epidemics.



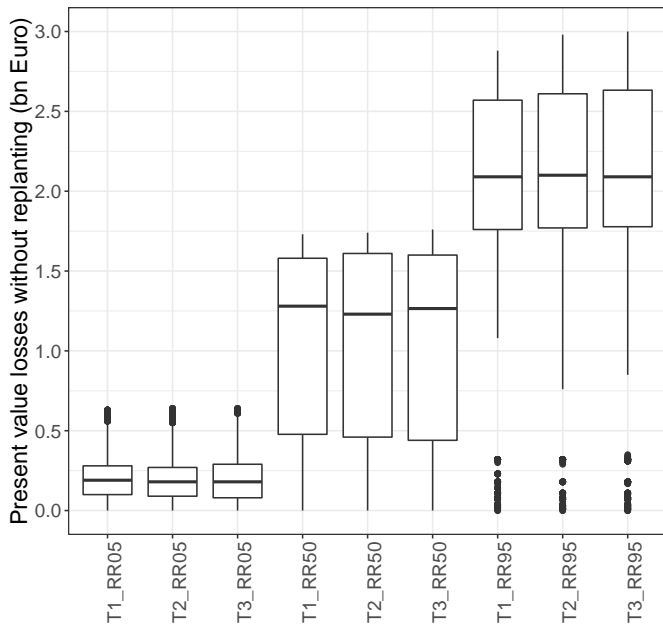

(a) Total impact without replanting

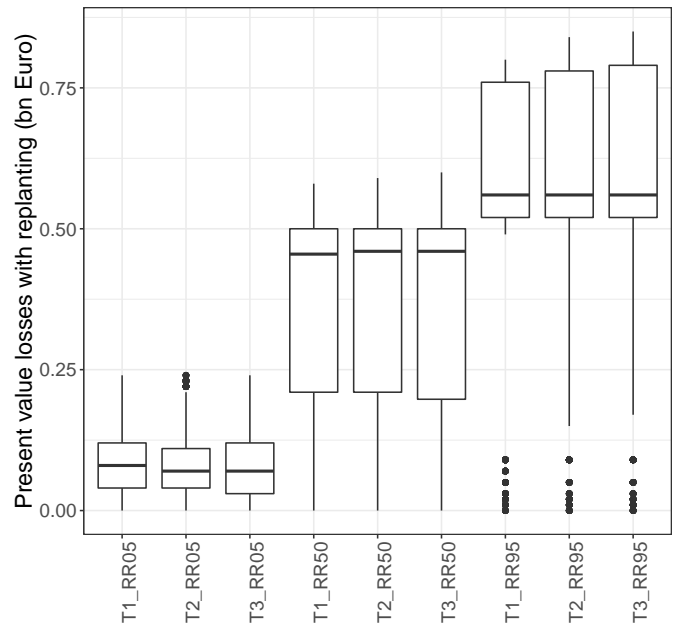

(b) Total impact with replanting

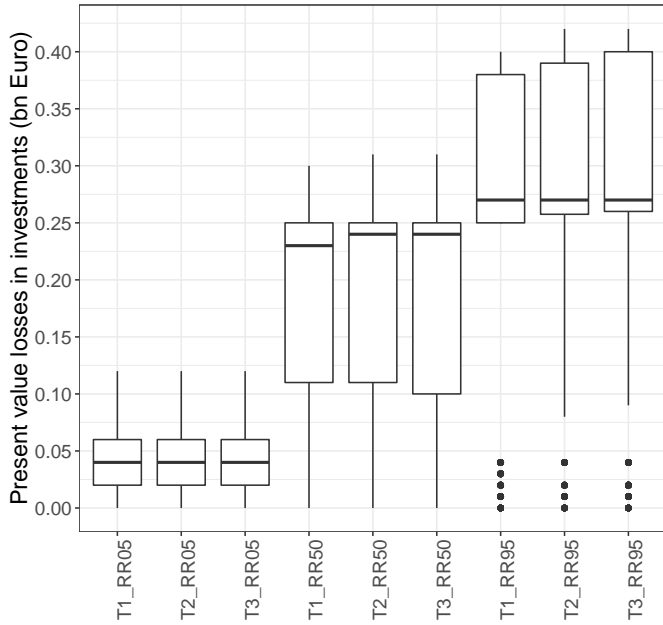

(c) Losses in investment

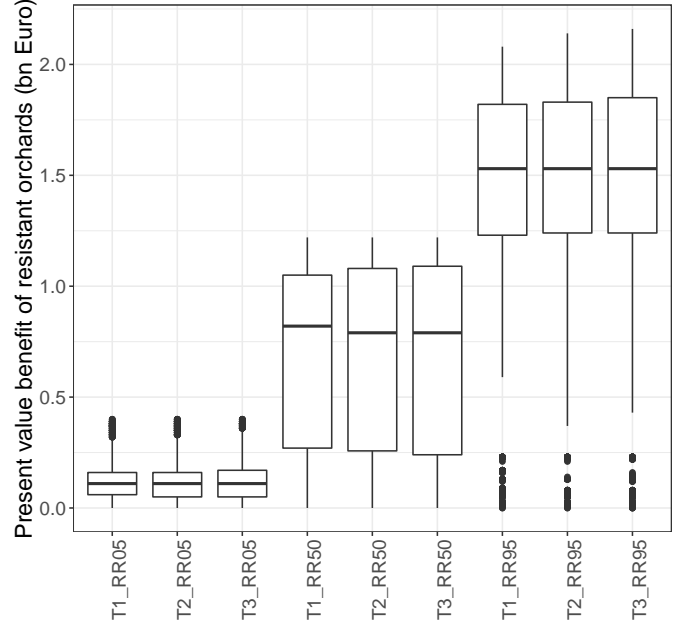

(d) Benefit of resistant orchards

Fig. S8. Distribution of economic results across all random points of introduction in Greece for all spread scenarios

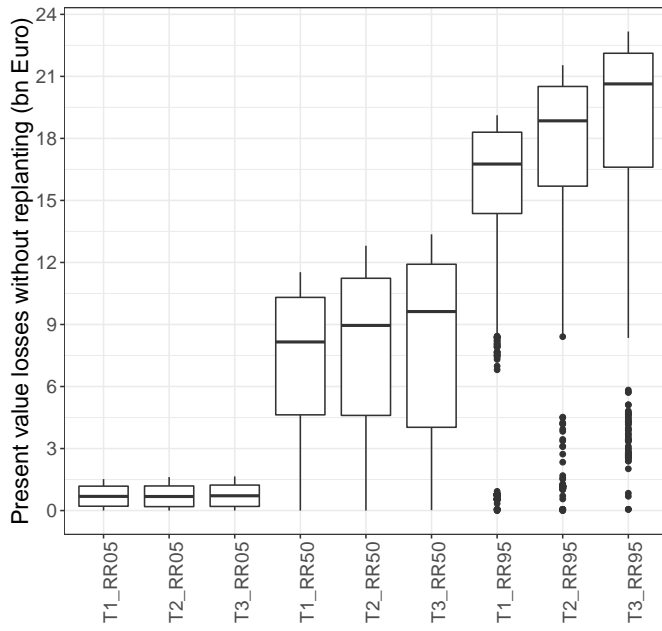

(a) Total impact without replanting

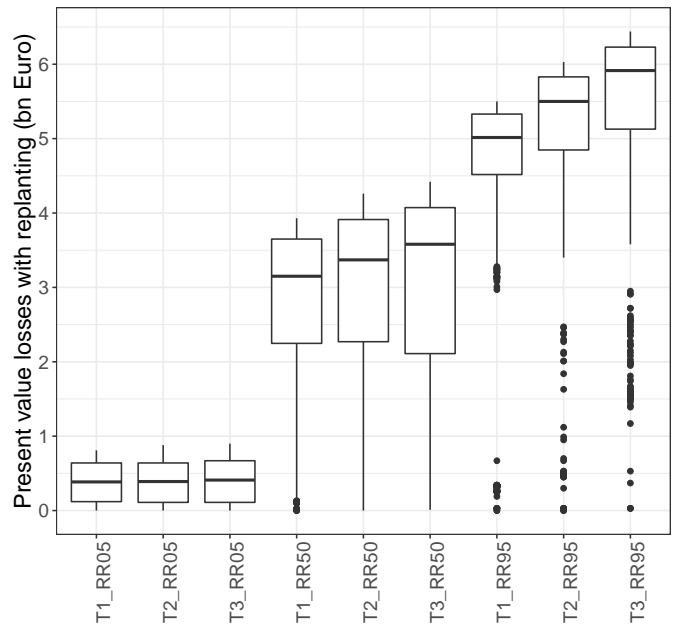

(b) Total impact with replanting

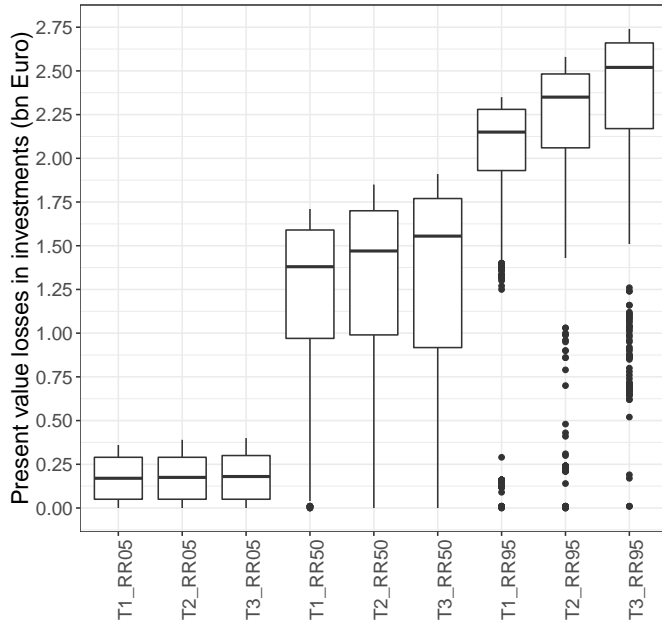

(c) Losses in investment

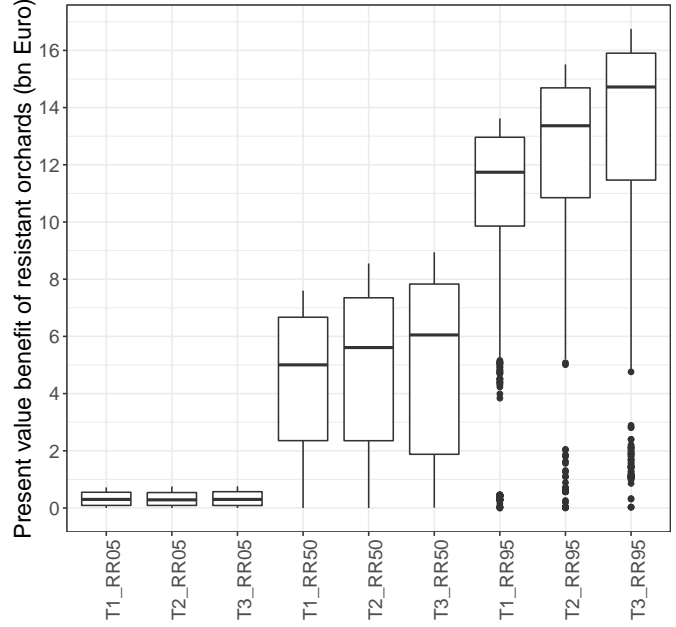

(d) Benefit of resistant orchards

Fig. S9. Distribution of economic results across all random points of introduction in Spain for all spread scenarios

**Table S1. Economic parameters for the deterministic analysis as well as the global sensitivity analysis**

| Parameter                                                  | Deterministic | Global Sensitivity Analysis |           |         |
|------------------------------------------------------------|---------------|-----------------------------|-----------|---------|
|                                                            |               | Distribution                | Mean/Min. | SD/Max. |
| Planning Horizon ( <i>years</i> )                          | 50            | -                           | -         | -       |
| Total area of production in Europe ( <i>ha</i> )           | 4,600,000     | -                           | -         | -       |
| Total production in Italy ( <i>tons</i> )                  | 3,188,712     | normal                      | 3,188,712 | 175,940 |
| Total production in Greece ( <i>tons</i> )                 | 2,367,466     | -                           | -         | -       |
| Total production in Spain ( <i>tons</i> )                  | 6,689,447     | -                           | -         | -       |
| Price in Italy ( <i>Euro ton<sup>-1</sup></i> )            | 496           | normal                      | 496       | 116     |
| Price in Greece ( <i>Euro ton<sup>-1</sup></i> )           | 560           | -                           | -         | -       |
| Price in Spain ( <i>Euro ton<sup>-1</sup></i> )            | 481           | -                           | -         | -       |
| Operating Costs in Italy ( <i>Euro ton<sup>-1</sup></i> )  | 316           | normal                      | 316       | 52      |
| Operating Costs in Greece ( <i>Euro ton<sup>-1</sup></i> ) | 387           | -                           | -         | -       |
| Operating Costs in Spain ( <i>Euro ton<sup>-1</sup></i> )  | 247           | -                           | -         | -       |
| Price response (%)                                         | 0.52          | normal                      | 0.52      | 0.1     |
| Discount rate (%)                                          | 3             | uniform                     | 3         | 7       |
| Xfp yield-decline (%)                                      | 10            | uniform                     | -50       | -5      |
| Xfp cost-change (%)                                        | 10            | uniform                     | -25       | 25      |
| Full-bearing age RT ( <i>years</i> )                       | 10            | uniform                     | 10        | 15      |
| Full-bearing age IT ( <i>years</i> )                       | 8             | uniform                     | 8         | 10      |
| Full-bearing age RI ( <i>years</i> )                       | 6             | uniform                     | 6         | 8       |
| Full-bearing age II ( <i>years</i> )                       | 5             | uniform                     | 5         | 7       |
| Full-bearing age RHD ( <i>years</i> )                      | 4             | uniform                     | 4         | 5       |
| Full-bearing age IHD ( <i>years</i> )                      | 3             | uniform                     | 3         | 6       |
| Yield potential RT ( <i>ton ha<sup>-1</sup></i> )          | 2.5           | uniform                     | 1         | 5       |
| Yield potential IT ( <i>ton ha<sup>-1</sup></i> )          | 5             | uniform                     | 5         | 10      |
| Yield potential RI ( <i>ton ha<sup>-1</sup></i> )          | 5             | uniform                     | 4         | 6       |
| Yield potential II ( <i>ton ha<sup>-1</sup></i> )          | 8             | uniform                     | 8         | 10      |
| Yield potential RHD ( <i>ton ha<sup>-1</sup></i> )         | 5             | uniform                     | 4         | 6       |
| Yield potential IHD ( <i>ton ha<sup>-1</sup></i> )         | 10            | uniform                     | 10        | 16      |
| Replanting cost RT ( <i>Euro ha<sup>-1</sup></i> )         | 500           | uniform                     | 500       | 1000    |
| Replanting cost IT ( <i>Euro ha<sup>-1</sup></i> )         | 2500          | uniform                     | 2500      | 5000    |
| Replanting cost RI ( <i>Euro ha<sup>-1</sup></i> )         | 750           | uniform                     | 750       | 1500    |
| Replanting cost II ( <i>Euro ha<sup>-1</sup></i> )         | 3000          | uniform                     | 3000      | 6000    |
| Replanting cost RHD ( <i>Euro ha<sup>-1</sup></i> )        | 3000          | uniform                     | 3000      | 6000    |
| Replanting cost IHD ( <i>Euro ha<sup>-1</sup></i> )        | 6000          | uniform                     | 6000      | 12000   |
| Longevity RT ( <i>years</i> )                              | 135           | uniform                     | 135       | 270     |
| Longevity IT ( <i>years</i> )                              | 135           | uniform                     | 135       | 270     |
| Longevity RI ( <i>years</i> )                              | 75            | uniform                     | 75        | 150     |
| Longevity II ( <i>years</i> )                              | 75            | uniform                     | 75        | 150     |
| Longevity RHD ( <i>years</i> )                             | 55            | uniform                     | 55        | 110     |
| Longevity IHD ( <i>years</i> )                             | 55            | uniform                     | 55        | 110     |

Cropping systems are rainfed-traditional (RT), irrigated-traditional (IT), rainfed-intensive (RI), irrigated-intensive (II), rainfed-high-density (RHD) and irrigated-high-density (IHD)

Table S2. Economic impact over 50 years in billion Euro for all spread scenarios.

| Spread Scenario          | Without Replanting |        |       |                   |        |       | With Replanting |       |       |                   |       |       | Lost Investment | Benefits of Resistance |       |       |
|--------------------------|--------------------|--------|-------|-------------------|--------|-------|-----------------|-------|-------|-------------------|-------|-------|-----------------|------------------------|-------|-------|
|                          | Total Impact       |        |       | Change in Profits |        |       | Total Impact    |       |       | Change in Profits |       |       |                 | EL                     | ES    | IT    |
|                          | EL                 | ES     | IT    | EL                | ES     | IT    | EL              | ES    | IT    | EL                | ES    | IT    |                 |                        |       |       |
| <i>Spread in Italy</i>   |                    |        |       |                   |        |       |                 |       |       |                   |       |       |                 |                        |       |       |
| T1-RR05                  | 0.68               | 1.71   | -1.86 | 0.68              | 1.71   | -1.65 | 0.10            | 0.26  | -0.59 | 0.10              | 0.26  | -0.38 | -0.21           | -0.58                  | -1.45 | 1.27  |
| T2-RR05                  | 0.68               | 1.71   | -1.86 | 0.68              | 1.71   | -1.65 | 0.10            | 0.26  | -0.59 | 0.10              | 0.26  | -0.38 | -0.21           | -0.58                  | -1.45 | 1.27  |
| T3-RR05                  | 0.68               | 1.71   | -1.86 | 0.68              | 1.71   | -1.65 | 0.10            | 0.26  | -0.59 | 0.10              | 0.26  | -0.38 | -0.21           | -0.58                  | -1.45 | 1.27  |
| T1-RR50                  | 1.03               | 2.59   | -3.13 | 1.03              | 2.59   | -2.73 | 0.16            | 0.42  | -1.04 | 0.16              | 0.42  | -0.64 | -0.40           | -0.86                  | -2.17 | 2.09  |
| T2-RR50                  | 1.04               | 2.61   | -3.15 | 1.04              | 2.61   | -2.75 | 0.17            | 0.42  | -1.05 | 0.17              | 0.42  | -0.65 | -0.40           | -0.87                  | -2.18 | 2.10  |
| T3-RR50                  | 1.05               | 2.64   | -3.21 | 1.05              | 2.64   | -2.80 | 0.17            | 0.43  | -1.08 | 0.17              | 0.43  | -0.66 | -0.41           | -0.88                  | -2.21 | 2.14  |
| T1-RR95                  | 1.57               | 3.94   | -5.10 | 1.57              | 3.94   | -4.50 | 0.24            | 0.61  | -1.55 | 0.24              | 0.61  | -0.95 | -0.60           | -1.33                  | -3.34 | 3.55  |
| T2-RR95                  | 1.59               | 3.99   | -5.17 | 1.59              | 3.99   | -4.56 | 0.24            | 0.62  | -1.57 | 0.24              | 0.62  | -0.96 | -0.61           | -1.34                  | -3.37 | 3.60  |
| T3-RR95                  | 1.64               | 4.12   | -5.41 | 1.64              | 4.12   | -4.77 | 0.25            | 0.64  | -1.64 | 0.25              | 0.64  | -1.00 | -0.63           | -1.39                  | -3.48 | 3.77  |
| <i>Spread in Greece*</i> |                    |        |       |                   |        |       |                 |       |       |                   |       |       |                 |                        |       |       |
| T1-RR05                  | -0.22              | 0.18   | 0.09  | -0.17             | 0.18   | 0.09  | -0.09           | 0.03  | 0.01  | -0.04             | 0.03  | 0.01  | -0.05           | 0.13                   | -0.16 | -0.07 |
| T2-RR05                  | -0.21              | 0.18   | 0.09  | -0.17             | 0.18   | 0.09  | -0.09           | 0.03  | 0.01  | -0.04             | 0.03  | 0.01  | -0.04           | 0.13                   | -0.15 | -0.07 |
| T3-RR05                  | -0.22              | 0.18   | 0.09  | -0.17             | 0.18   | 0.09  | -0.09           | 0.03  | 0.01  | -0.04             | 0.03  | 0.01  | -0.05           | 0.13                   | -0.15 | -0.07 |
| T1-RR50                  | -1.09              | 0.90   | 0.43  | -0.90             | 0.90   | 0.43  | -0.37           | 0.12  | 0.06  | -0.18             | 0.12  | 0.06  | -0.19           | 0.72                   | -0.78 | -0.37 |
| T2-RR50                  | -1.08              | 0.89   | 0.42  | -0.89             | 0.89   | 0.42  | -0.37           | 0.12  | 0.06  | -0.18             | 0.12  | 0.06  | -0.19           | 0.71                   | -0.77 | -0.37 |
| T3-RR50                  | -1.07              | 0.88   | 0.42  | -0.88             | 0.88   | 0.42  | -0.36           | 0.12  | 0.06  | -0.18             | 0.12  | 0.06  | -0.18           | 0.70                   | -0.76 | -0.37 |
| T1-RR95                  | -1.87              | 1.56   | 0.75  | -1.60             | 1.56   | 0.75  | -0.54           | 0.18  | 0.09  | -0.28             | 0.18  | 0.09  | -0.27           | 1.33                   | -1.38 | -0.66 |
| T2-RR95                  | -1.94              | 1.60   | 0.76  | -1.65             | 1.60   | 0.76  | -0.58           | 0.19  | 0.09  | -0.29             | 0.19  | 0.09  | -0.29           | 1.36                   | -1.41 | -0.67 |
| T3-RR95                  | -1.91              | 1.58   | 0.75  | -1.63             | 1.58   | 0.75  | -0.57           | 0.19  | 0.09  | -0.29             | 0.19  | 0.09  | -0.28           | 1.34                   | -1.39 | -0.66 |
| <i>Spread in Spain*</i>  |                    |        |       |                   |        |       |                 |       |       |                   |       |       |                 |                        |       |       |
| T1-RR05                  | 0.21               | -0.70  | 0.25  | 0.21              | -0.53  | 0.25  | 0.05            | -0.38 | 0.06  | 0.05              | -0.21 | 0.06  | -0.17           | -0.16                  | 0.32  | -0.20 |
| T2-RR05                  | 0.21               | -0.71  | 0.25  | 0.21              | -0.53  | 0.25  | 0.05            | -0.39 | 0.06  | 0.05              | -0.21 | 0.06  | -0.17           | -0.16                  | 0.32  | -0.19 |
| T3-RR05                  | 0.22               | -0.73  | 0.26  | 0.22              | -0.55  | 0.26  | 0.05            | -0.40 | 0.06  | 0.05              | -0.22 | 0.06  | -0.18           | -0.17                  | 0.33  | -0.20 |
| T1-RR50                  | 1.79               | -7.21  | 2.14  | 1.79              | -6.01  | 2.14  | 0.35            | -2.76 | 0.42  | 0.35              | -1.56 | 0.42  | -1.21           | -1.44                  | 4.45  | -1.72 |
| T2-RR50                  | 1.90               | -7.83  | 2.27  | 1.90              | -6.55  | 2.27  | 0.37            | -2.93 | 0.44  | 0.37              | -1.65 | 0.44  | -1.27           | -1.53                  | 4.90  | -1.83 |
| T3-RR50                  | 1.96               | -8.20  | 2.35  | 1.96              | -6.88  | 2.35  | 0.38            | -3.04 | 0.46  | 0.38              | -1.72 | 0.46  | -1.32           | -1.58                  | 5.16  | -1.89 |
| T1-RR95                  | 3.54               | -15.33 | 4.24  | 3.54              | -13.34 | 4.24  | 0.57            | -4.63 | 0.69  | 0.57              | -2.65 | 0.69  | -1.99           | -2.97                  | 10.69 | -3.56 |
| T2-RR95                  | 3.76               | -16.86 | 4.50  | 3.76              | -14.74 | 4.50  | 0.61            | -4.98 | 0.73  | 0.61              | -2.85 | 0.73  | -2.12           | -3.15                  | 11.88 | -3.77 |
| T3-RR95                  | 4.01               | -18.59 | 4.80  | 4.01              | -16.26 | 4.80  | 0.66            | -5.48 | 0.80  | 0.66              | -3.15 | 0.80  | -2.33           | -3.35                  | 13.11 | -4.00 |

\* averaged over all random points of introduction. EL=Greece, ES=Spain, IT=Italy

**Table S3. First order sensitivity indices for all parameters for the economic impact without replanting**

| Parameter                                                 | Original | Bias    | Std.Error | Min. CI | Max. CI |
|-----------------------------------------------------------|----------|---------|-----------|---------|---------|
| Price in Italy ( <i>Euro ton<sup>-1</sup></i> )           | 0.6643   | -0.0001 | 0.0069    | 0.6509  | 0.6785  |
| Price response (%)                                        | 0.0034   | -0.0003 | 0.0145    | -0.0234 | 0.0348  |
| Operating Costs in Italy ( <i>Euro ton<sup>-1</sup></i> ) | 0.1649   | -0.0008 | 0.0134    | 0.1388  | 0.1925  |
| Total production IT ( <i>ton</i> )                        | -0.0004  | -0.0003 | 0.0147    | -0.0274 | 0.0315  |
| Discount rate (%)                                         | 0.0331   | 0.0000  | 0.0165    | 0.0024  | 0.0687  |
| Xfp yield-decline (%)                                     | 0.0226   | -0.0004 | 0.0146    | -0.0044 | 0.0526  |
| Xfp cost-change (%)                                       | 0.0196   | -0.0005 | 0.0146    | -0.0069 | 0.0504  |
| Longevity RT ( <i>years</i> )                             | 0.0008   | -0.0003 | 0.0146    | -0.0264 | 0.0328  |
| Longevity IT ( <i>years</i> )                             | 0.0007   | -0.0003 | 0.0146    | -0.0259 | 0.0318  |
| Longevity RI ( <i>years</i> )                             | 0.0038   | -0.0003 | 0.0145    | -0.0228 | 0.0351  |
| Longevity II ( <i>years</i> )                             | -0.0002  | -0.0003 | 0.0146    | -0.0272 | 0.0318  |
| Longevity RHD ( <i>years</i> )                            | 0.0000   | -0.0003 | 0.0146    | -0.0269 | 0.0315  |
| Longevity IHD ( <i>years</i> )                            | 0.0002   | -0.0003 | 0.0146    | -0.0265 | 0.0319  |
| Replanting cost RT ( <i>Euro ha<sup>-1</sup></i> )        | 0.0008   | -0.0003 | 0.0145    | -0.0260 | 0.0319  |
| Replanting cost IT ( <i>Euro ha<sup>-1</sup></i> )        | 0.0000   | -0.0003 | 0.0145    | -0.0269 | 0.0316  |
| Replanting cost RI ( <i>Euro ha<sup>-1</sup></i> )        | 0.0002   | -0.0003 | 0.0146    | -0.0266 | 0.0311  |
| Replanting cost II ( <i>Euro ha<sup>-1</sup></i> )        | 0.0004   | -0.0003 | 0.0145    | -0.0266 | 0.0317  |
| Replanting cost RHD ( <i>Euro ha<sup>-1</sup></i> )       | 0.0001   | -0.0003 | 0.0146    | -0.0268 | 0.0316  |
| Replanting cost IHD ( <i>Euro ha<sup>-1</sup></i> )       | 0.0002   | -0.0003 | 0.0146    | -0.0266 | 0.0319  |
| Full-bearing age RT ( <i>years</i> )                      | 0.0002   | -0.0003 | 0.0145    | -0.0266 | 0.0318  |
| Full-bearing age IT ( <i>years</i> )                      | 0.0002   | -0.0003 | 0.0146    | -0.0266 | 0.0318  |
| Full-bearing age RI ( <i>years</i> )                      | 0.0001   | -0.0003 | 0.0145    | -0.0268 | 0.0317  |
| Full-bearing age II ( <i>years</i> )                      | 0.0002   | -0.0003 | 0.0146    | -0.0266 | 0.0318  |
| Full-bearing age RHD ( <i>years</i> )                     | 0.0002   | -0.0003 | 0.0146    | -0.0266 | 0.0318  |
| Full-bearing age IHD ( <i>years</i> )                     | 0.0002   | -0.0003 | 0.0146    | -0.0266 | 0.0318  |
| Yield Potential RT ( <i>ton ha<sup>-1</sup></i> )         | 0.0001   | -0.0003 | 0.0145    | -0.0268 | 0.0319  |
| Yield Potential IT ( <i>ton ha<sup>-1</sup></i> )         | 0.0000   | -0.0003 | 0.0146    | -0.0271 | 0.0316  |
| Yield Potential RI ( <i>ton ha<sup>-1</sup></i> )         | 0.0003   | -0.0003 | 0.0145    | -0.0267 | 0.0319  |
| Yield Potential II ( <i>ton ha<sup>-1</sup></i> )         | 0.0001   | -0.0003 | 0.0145    | -0.0269 | 0.0318  |
| Yield Potential RHD ( <i>ton ha<sup>-1</sup></i> )        | -0.0001  | -0.0003 | 0.0146    | -0.0270 | 0.0315  |
| Yield Potential IHD ( <i>ton ha<sup>-1</sup></i> )        | 0.0001   | -0.0003 | 0.0146    | -0.0268 | 0.0317  |

Cropping systems are rainfed-traditional (RT), irrigated-traditional (IT), rainfed-intensive (RI), irrigated-intensive (II), rainfed-high-density (RHD) and irrigated-high-density (IHD)

**Table S4. Total order sensitivity indices for all parameters for the economic impact without replanting**

| Parameter                                                 | Original | Bias   | Std.Error | Min. CI | Max. CI |
|-----------------------------------------------------------|----------|--------|-----------|---------|---------|
| Price in Italy ( <i>Euro ton<sup>-1</sup></i> )           | 0.7171   | 0.0007 | 0.0123    | 0.6922  | 0.7410  |
| Price response (%)                                        | 0.0039   | 0.0000 | 0.0001    | 0.0037  | 0.0040  |
| Operating Costs in Italy ( <i>Euro ton<sup>-1</sup></i> ) | 0.1689   | 0.0002 | 0.0034    | 0.1620  | 0.1760  |
| Total production IT ( <i>ton</i> )                        | 0.0044   | 0.0000 | 0.0001    | 0.0041  | 0.0046  |
| Discount rate (%)                                         | 0.0703   | 0.0000 | 0.0018    | 0.0667  | 0.0737  |
| Xfp yield-decline (%)                                     | 0.0727   | 0.0001 | 0.0023    | 0.0679  | 0.0770  |
| Xfp cost-change (%)                                       | 0.0577   | 0.0001 | 0.0018    | 0.0542  | 0.0612  |
| Longevity RT ( <i>years</i> )                             | 0.0020   | 0.0000 | 0.0000    | 0.0019  | 0.0021  |
| Longevity IT ( <i>years</i> )                             | 0.0008   | 0.0000 | 0.0000    | 0.0008  | 0.0008  |
| Longevity RI ( <i>years</i> )                             | 0.0030   | 0.0000 | 0.0001    | 0.0028  | 0.0031  |
| Longevity II ( <i>years</i> )                             | 0.0007   | 0.0000 | 0.0000    | 0.0007  | 0.0007  |
| Longevity RHD ( <i>years</i> )                            | 0.0002   | 0.0000 | 0.0000    | 0.0002  | 0.0002  |
| Longevity IHD ( <i>years</i> )                            | 0.0000   | 0.0000 | 0.0000    | 0.0000  | 0.0000  |
| Replanting cost RT ( <i>Euro ha<sup>-1</sup></i> )        | 0.0010   | 0.0000 | 0.0000    | 0.0009  | 0.0010  |
| Replanting cost IT ( <i>Euro ha<sup>-1</sup></i> )        | 0.0005   | 0.0000 | 0.0000    | 0.0005  | 0.0005  |
| Replanting cost RI ( <i>Euro ha<sup>-1</sup></i> )        | 0.0008   | 0.0000 | 0.0000    | 0.0007  | 0.0008  |
| Replanting cost II ( <i>Euro ha<sup>-1</sup></i> )        | 0.0002   | 0.0000 | 0.0000    | 0.0002  | 0.0003  |
| Replanting cost RHD ( <i>Euro ha<sup>-1</sup></i> )       | 0.0001   | 0.0000 | 0.0000    | 0.0001  | 0.0001  |
| Replanting cost IHD ( <i>Euro ha<sup>-1</sup></i> )       | 0.0000   | 0.0000 | 0.0000    | 0.0000  | 0.0000  |
| Full-bearing age RT ( <i>years</i> )                      | 0.0000   | 0.0000 | 0.0000    | 0.0000  | 0.0000  |
| Full-bearing age IT ( <i>years</i> )                      | 0.0000   | 0.0000 | 0.0000    | 0.0000  | 0.0000  |
| Full-bearing age RI ( <i>years</i> )                      | 0.0000   | 0.0000 | 0.0000    | 0.0000  | 0.0000  |
| Full-bearing age II ( <i>years</i> )                      | 0.0000   | 0.0000 | 0.0000    | 0.0000  | 0.0000  |
| Full-bearing age RHD ( <i>years</i> )                     | 0.0000   | 0.0000 | 0.0000    | 0.0000  | 0.0000  |
| Full-bearing age IHD ( <i>years</i> )                     | 0.0000   | 0.0000 | 0.0000    | 0.0000  | 0.0000  |
| Yield Potential RT ( <i>ton ha<sup>-1</sup></i> )         | 0.0006   | 0.0000 | 0.0000    | 0.0006  | 0.0007  |
| Yield Potential IT ( <i>ton ha<sup>-1</sup></i> )         | 0.0003   | 0.0000 | 0.0000    | 0.0002  | 0.0003  |
| Yield Potential RI ( <i>ton ha<sup>-1</sup></i> )         | 0.0004   | 0.0000 | 0.0000    | 0.0003  | 0.0004  |
| Yield Potential II ( <i>ton ha<sup>-1</sup></i> )         | 0.0001   | 0.0000 | 0.0000    | 0.0001  | 0.0002  |
| Yield Potential RHD ( <i>ton ha<sup>-1</sup></i> )        | 0.0001   | 0.0000 | 0.0000    | 0.0001  | 0.0001  |
| Yield Potential IHD ( <i>ton ha<sup>-1</sup></i> )        | 0.0000   | 0.0000 | 0.0000    | 0.0000  | 0.0000  |

Cropping systems are rainfed-traditional (RT), irrigated-traditional (IT), rainfed-intensive (RI), irrigated-intensive (II), rainfed-high-density (RHD) and irrigated-high-density (IHD)

**Table S5. First order sensitivity indices for all parameters for the economic impact with replanting**

| Parameter                                                 | Original | Bias   | Std.Error | Min. CI | Max. CI |
|-----------------------------------------------------------|----------|--------|-----------|---------|---------|
| Price in Italy ( <i>Euro ton<sup>-1</sup></i> )           | 0.6186   | 0.0001 | 0.0112    | 0.5976  | 0.6405  |
| Price response (%)                                        | -0.0117  | 0.0001 | 0.0192    | -0.0481 | 0.0275  |
| Operating Costs in Italy ( <i>Euro ton<sup>-1</sup></i> ) | 0.1421   | 0.0000 | 0.0194    | 0.1050  | 0.1837  |
| Total production IT ( <i>ton</i> )                        | -0.0129  | 0.0001 | 0.0194    | -0.0504 | 0.0271  |
| Discount rate (%)                                         | -0.0096  | 0.0001 | 0.0215    | -0.0510 | 0.0348  |
| Xfp yield-decline (%)                                     | -0.0065  | 0.0001 | 0.0212    | -0.0482 | 0.0373  |
| Xfp cost-change (%)                                       | -0.0260  | 0.0003 | 0.0219    | -0.0687 | 0.0191  |
| Longevity RT ( <i>years</i> )                             | -0.0108  | 0.0001 | 0.0190    | -0.0475 | 0.0286  |
| Longevity IT ( <i>years</i> )                             | -0.0129  | 0.0001 | 0.0190    | -0.0497 | 0.0269  |
| Longevity RI ( <i>years</i> )                             | -0.0043  | 0.0001 | 0.0189    | -0.0408 | 0.0347  |
| Longevity II ( <i>years</i> )                             | -0.0153  | 0.0001 | 0.0190    | -0.0527 | 0.0241  |
| Longevity RHD ( <i>years</i> )                            | -0.0148  | 0.0001 | 0.0190    | -0.0517 | 0.0248  |
| Longevity IHD ( <i>years</i> )                            | -0.0151  | 0.0001 | 0.0190    | -0.0524 | 0.0244  |
| Replanting cost RT ( <i>Euro ha<sup>-1</sup></i> )        | -0.0126  | 0.0001 | 0.0191    | -0.0501 | 0.0268  |
| Replanting cost IT ( <i>Euro ha<sup>-1</sup></i> )        | -0.0148  | 0.0001 | 0.0190    | -0.0519 | 0.0249  |
| Replanting cost RI ( <i>Euro ha<sup>-1</sup></i> )        | -0.0102  | 0.0002 | 0.0190    | -0.0472 | 0.0296  |
| Replanting cost II ( <i>Euro ha<sup>-1</sup></i> )        | -0.0140  | 0.0001 | 0.0190    | -0.0509 | 0.0249  |
| Replanting cost RHD ( <i>Euro ha<sup>-1</sup></i> )       | -0.0146  | 0.0001 | 0.0190    | -0.0520 | 0.0255  |
| Replanting cost IHD ( <i>Euro ha<sup>-1</sup></i> )       | -0.0152  | 0.0001 | 0.0190    | -0.0525 | 0.0245  |
| Full-bearing age RT ( <i>years</i> )                      | -0.0156  | 0.0001 | 0.0190    | -0.0529 | 0.0240  |
| Full-bearing age IT ( <i>years</i> )                      | -0.0152  | 0.0001 | 0.0190    | -0.0526 | 0.0246  |
| Full-bearing age RI ( <i>years</i> )                      | -0.0150  | 0.0001 | 0.0190    | -0.0521 | 0.0249  |
| Full-bearing age II ( <i>years</i> )                      | -0.0152  | 0.0001 | 0.0190    | -0.0524 | 0.0246  |
| Full-bearing age RHD ( <i>years</i> )                     | -0.0153  | 0.0001 | 0.0190    | -0.0525 | 0.0245  |
| Full-bearing age IHD ( <i>years</i> )                     | -0.0152  | 0.0001 | 0.0190    | -0.0526 | 0.0246  |
| Yield Potential RT ( <i>ton ha<sup>-1</sup></i> )         | -0.0133  | 0.0001 | 0.0190    | -0.0504 | 0.0265  |
| Yield Potential IT ( <i>ton ha<sup>-1</sup></i> )         | -0.0161  | 0.0001 | 0.0191    | -0.0534 | 0.0239  |
| Yield Potential RI ( <i>ton ha<sup>-1</sup></i> )         | -0.0144  | 0.0001 | 0.0190    | -0.0515 | 0.0261  |
| Yield Potential II ( <i>ton ha<sup>-1</sup></i> )         | -0.0151  | 0.0001 | 0.0190    | -0.0524 | 0.0246  |
| Yield Potential RHD ( <i>ton ha<sup>-1</sup></i> )        | -0.0152  | 0.0001 | 0.0191    | -0.0528 | 0.0248  |
| Yield Potential IHD ( <i>ton ha<sup>-1</sup></i> )        | -0.0153  | 0.0001 | 0.0190    | -0.0526 | 0.0245  |

Cropping systems are rainfed-traditional (RT), irrigated-traditional (IT), rainfed-intensive (RI), irrigated-intensive (II), rainfed-high-density (RHD) and irrigated-high-density (IHD)

**Table S6. Total order sensitivity indices for all parameters for the economic impact with replanting**

| Parameter                                                 | Original | Bias   | Std.Error | Min. CI | Max. CI |
|-----------------------------------------------------------|----------|--------|-----------|---------|---------|
| Price in Italy ( <i>Euro ton<sup>-1</sup></i> )           | 0.7565   | 0.0001 | 0.0151    | 0.7266  | 0.7853  |
| Price response (%)                                        | 0.0029   | 0.0000 | 0.0001    | 0.0027  | 0.0031  |
| Operating Costs in Italy ( <i>Euro ton<sup>-1</sup></i> ) | 0.2231   | 0.0002 | 0.0064    | 0.2092  | 0.2352  |
| Total production IT ( <i>ton</i> )                        | 0.0038   | 0.0000 | 0.0002    | 0.0033  | 0.0042  |
| Discount rate (%)                                         | 0.0595   | 0.0000 | 0.0030    | 0.0534  | 0.0654  |
| Xfp yield-decline (%)                                     | 0.0965   | 0.0002 | 0.0039    | 0.0889  | 0.1039  |
| Xfp cost-change (%)                                       | 0.0907   | 0.0000 | 0.0040    | 0.0824  | 0.0984  |
| Longevity RT ( <i>years</i> )                             | 0.0082   | 0.0000 | 0.0002    | 0.0077  | 0.0086  |
| Longevity IT ( <i>years</i> )                             | 0.0033   | 0.0000 | 0.0001    | 0.0031  | 0.0035  |
| Longevity RI ( <i>years</i> )                             | 0.0104   | 0.0000 | 0.0003    | 0.0098  | 0.0110  |
| Longevity II ( <i>years</i> )                             | 0.0026   | 0.0000 | 0.0001    | 0.0025  | 0.0028  |
| Longevity RHD ( <i>years</i> )                            | 0.0008   | 0.0000 | 0.0000    | 0.0008  | 0.0009  |
| Longevity IHD ( <i>years</i> )                            | 0.0001   | 0.0000 | 0.0000    | 0.0001  | 0.0001  |
| Replanting cost RT ( <i>Euro ha<sup>-1</sup></i> )        | 0.0049   | 0.0000 | 0.0001    | 0.0046  | 0.0052  |
| Replanting cost IT ( <i>Euro ha<sup>-1</sup></i> )        | 0.0023   | 0.0000 | 0.0001    | 0.0022  | 0.0024  |
| Replanting cost RI ( <i>Euro ha<sup>-1</sup></i> )        | 0.0056   | 0.0000 | 0.0002    | 0.0051  | 0.0060  |
| Replanting cost II ( <i>Euro ha<sup>-1</sup></i> )        | 0.0015   | 0.0000 | 0.0000    | 0.0014  | 0.0016  |
| Replanting cost RHD ( <i>Euro ha<sup>-1</sup></i> )       | 0.0005   | 0.0000 | 0.0000    | 0.0004  | 0.0005  |
| Replanting cost IHD ( <i>Euro ha<sup>-1</sup></i> )       | 0.0000   | 0.0000 | 0.0000    | 0.0000  | 0.0000  |
| Full-bearing age RT ( <i>years</i> )                      | 0.0002   | 0.0000 | 0.0000    | 0.0002  | 0.0002  |
| Full-bearing age IT ( <i>years</i> )                      | 0.0000   | 0.0000 | 0.0000    | 0.0000  | 0.0000  |
| Full-bearing age RI ( <i>years</i> )                      | 0.0002   | 0.0000 | 0.0000    | 0.0002  | 0.0002  |
| Full-bearing age II ( <i>years</i> )                      | 0.0000   | 0.0000 | 0.0000    | 0.0000  | 0.0000  |
| Full-bearing age RHD ( <i>years</i> )                     | 0.0000   | 0.0000 | 0.0000    | 0.0000  | 0.0000  |
| Full-bearing age IHD ( <i>years</i> )                     | 0.0000   | 0.0000 | 0.0000    | 0.0000  | 0.0000  |
| Yield Potential RT ( <i>ton ha<sup>-1</sup></i> )         | 0.0019   | 0.0000 | 0.0002    | 0.0016  | 0.0022  |
| Yield Potential IT ( <i>ton ha<sup>-1</sup></i> )         | 0.0005   | 0.0000 | 0.0000    | 0.0004  | 0.0006  |
| Yield Potential RI ( <i>ton ha<sup>-1</sup></i> )         | 0.0008   | 0.0000 | 0.0001    | 0.0006  | 0.0009  |
| Yield Potential II ( <i>ton ha<sup>-1</sup></i> )         | 0.0002   | 0.0000 | 0.0001    | 0.0001  | 0.0003  |
| Yield Potential RHD ( <i>ton ha<sup>-1</sup></i> )        | 0.0001   | 0.0000 | 0.0000    | 0.0001  | 0.0002  |
| Yield Potential IHD ( <i>ton ha<sup>-1</sup></i> )        | 0.0000   | 0.0000 | 0.0000    | 0.0000  | 0.0000  |

Cropping systems are rainfed-traditional (RT), irrigated-traditional (IT), rainfed-intensive (RI), irrigated-intensive (II), rainfed-high-density (RHD) and irrigated-high-density (IHD)



**Table S7. First order sensitivity indices for all parameters for the benefit of resistance breeding**

| Parameter                                                 | Original | Bias    | Std.Error | Min. CI | Max. CI |
|-----------------------------------------------------------|----------|---------|-----------|---------|---------|
| Price in Italy ( <i>Euro ton<sup>-1</sup></i> )           | 0.4805   | -0.0001 | 0.0128    | 0.4560  | 0.5060  |
| Price response (%)                                        | 0.0018   | -0.0006 | 0.0164    | -0.0303 | 0.0338  |
| Operating Costs in Italy ( <i>Euro ton<sup>-1</sup></i> ) | 0.1166   | 0.0000  | 0.0156    | 0.0856  | 0.1478  |
| Total production IT ( <i>ton</i> )                        | -0.0034  | -0.0007 | 0.0166    | -0.0357 | 0.0291  |
| Discount rate (%)                                         | 0.0743   | -0.0007 | 0.0189    | 0.0386  | 0.1138  |
| Xfp yield-decline (%)                                     | 0.0398   | -0.0005 | 0.0163    | 0.0091  | 0.0739  |
| Xfp cost-change (%)                                       | 0.0388   | -0.0009 | 0.0164    | 0.0083  | 0.0729  |
| Longevity RT ( <i>years</i> )                             | -0.0015  | -0.0006 | 0.0164    | -0.0336 | 0.0309  |
| Longevity IT ( <i>years</i> )                             | -0.0016  | -0.0006 | 0.0164    | -0.0338 | 0.0309  |
| Longevity RI ( <i>years</i> )                             | -0.0013  | -0.0006 | 0.0164    | -0.0336 | 0.0309  |
| Longevity II ( <i>years</i> )                             | -0.0016  | -0.0006 | 0.0164    | -0.0337 | 0.0308  |
| Longevity RHD ( <i>years</i> )                            | -0.0017  | -0.0006 | 0.0164    | -0.0340 | 0.0308  |
| Longevity IHD ( <i>years</i> )                            | -0.0015  | -0.0006 | 0.0164    | -0.0337 | 0.0310  |
| Replanting cost RT ( <i>Euro ha<sup>-1</sup></i> )        | -0.0015  | -0.0006 | 0.0164    | -0.0332 | 0.0311  |
| Replanting cost IT ( <i>Euro ha<sup>-1</sup></i> )        | -0.0013  | -0.0006 | 0.0164    | -0.0338 | 0.0308  |
| Replanting cost RI ( <i>Euro ha<sup>-1</sup></i> )        | -0.0019  | -0.0005 | 0.0164    | -0.0337 | 0.0309  |
| Replanting cost II ( <i>Euro ha<sup>-1</sup></i> )        | -0.0017  | -0.0006 | 0.0164    | -0.0336 | 0.0306  |
| Replanting cost RHD ( <i>Euro ha<sup>-1</sup></i> )       | -0.0016  | -0.0006 | 0.0164    | -0.0339 | 0.0309  |
| Replanting cost IHD ( <i>Euro ha<sup>-1</sup></i> )       | -0.0016  | -0.0006 | 0.0164    | -0.0337 | 0.0310  |
| Full-bearing age RT ( <i>years</i> )                      | -0.0010  | -0.0006 | 0.0164    | -0.0332 | 0.0316  |
| Full-bearing age IT ( <i>years</i> )                      | -0.0016  | -0.0006 | 0.0164    | -0.0337 | 0.0309  |
| Full-bearing age RI ( <i>years</i> )                      | -0.0019  | -0.0006 | 0.0164    | -0.0339 | 0.0304  |
| Full-bearing age II ( <i>years</i> )                      | -0.0016  | -0.0006 | 0.0164    | -0.0339 | 0.0310  |
| Full-bearing age RHD ( <i>years</i> )                     | -0.0016  | -0.0006 | 0.0164    | -0.0338 | 0.0309  |
| Full-bearing age IHD ( <i>years</i> )                     | -0.0016  | -0.0006 | 0.0164    | -0.0338 | 0.0309  |
| Yield Potential RT ( <i>ton ha<sup>-1</sup></i> )         | -0.0030  | -0.0006 | 0.0164    | -0.0351 | 0.0296  |
| Yield Potential IT ( <i>ton ha<sup>-1</sup></i> )         | -0.0015  | -0.0006 | 0.0164    | -0.0338 | 0.0308  |
| Yield Potential RI ( <i>ton ha<sup>-1</sup></i> )         | -0.0024  | -0.0006 | 0.0164    | -0.0344 | 0.0302  |
| Yield Potential II ( <i>ton ha<sup>-1</sup></i> )         | -0.0022  | -0.0006 | 0.0164    | -0.0341 | 0.0301  |
| Yield Potential RHD ( <i>ton ha<sup>-1</sup></i> )        | -0.0019  | -0.0006 | 0.0164    | -0.0342 | 0.0307  |
| Yield Potential IHD ( <i>ton ha<sup>-1</sup></i> )        | -0.0017  | -0.0006 | 0.0164    | -0.0339 | 0.0308  |

Cropping systems are rainfed-traditional (RT), irrigated-traditional (IT), rainfed-intensive (RI), irrigated-intensive (II), rainfed-high-density (RHD) and irrigated-high-density (IHD)

**Table S8. Total order sensitivity indices for all parameters for the benefit of resistance breeding**

| Parameter                                                 | Original | Bias    | Std.Error | Min. CI | Max. CI |
|-----------------------------------------------------------|----------|---------|-----------|---------|---------|
| Price in Italy ( <i>Euro ton<sup>-1</sup></i> )           | 0.6297   | -0.0002 | 0.0120    | 0.6057  | 0.6541  |
| Price response (%)                                        | 0.0045   | 0.0000  | 0.0001    | 0.0043  | 0.0047  |
| Operating Costs in Italy ( <i>Euro ton<sup>-1</sup></i> ) | 0.1486   | 0.0000  | 0.0036    | 0.1416  | 0.1557  |
| Total production IT ( <i>ton</i> )                        | 0.0057   | 0.0000  | 0.0002    | 0.0053  | 0.0060  |
| Discount rate (%)                                         | 0.1603   | 0.0003  | 0.0035    | 0.1530  | 0.1673  |
| Xfp yield-decline (%)                                     | 0.1905   | -0.0004 | 0.0079    | 0.1758  | 0.2060  |
| Xfp cost-change (%)                                       | 0.1630   | -0.0001 | 0.0066    | 0.1495  | 0.1761  |
| Longevity RT ( <i>years</i> )                             | 0.0000   | 0.0000  | 0.0000    | 0.0000  | 0.0000  |
| Longevity IT ( <i>years</i> )                             | 0.0000   | 0.0000  | 0.0000    | 0.0000  | 0.0000  |
| Longevity RI ( <i>years</i> )                             | 0.0002   | 0.0000  | 0.0000    | 0.0002  | 0.0002  |
| Longevity II ( <i>years</i> )                             | 0.0000   | 0.0000  | 0.0000    | 0.0000  | 0.0000  |
| Longevity RHD ( <i>years</i> )                            | 0.0000   | 0.0000  | 0.0000    | 0.0000  | 0.0000  |
| Longevity IHD ( <i>years</i> )                            | 0.0000   | 0.0000  | 0.0000    | 0.0000  | 0.0000  |
| Replanting cost RT ( <i>Euro ha<sup>-1</sup></i> )        | 0.0004   | 0.0000  | 0.0000    | 0.0004  | 0.0005  |
| Replanting cost IT ( <i>Euro ha<sup>-1</sup></i> )        | 0.0002   | 0.0000  | 0.0000    | 0.0002  | 0.0002  |
| Replanting cost RI ( <i>Euro ha<sup>-1</sup></i> )        | 0.0011   | 0.0000  | 0.0001    | 0.0008  | 0.0013  |
| Replanting cost II ( <i>Euro ha<sup>-1</sup></i> )        | 0.0002   | 0.0000  | 0.0000    | 0.0002  | 0.0002  |
| Replanting cost RHD ( <i>Euro ha<sup>-1</sup></i> )       | 0.0001   | 0.0000  | 0.0000    | 0.0001  | 0.0001  |
| Replanting cost IHD ( <i>Euro ha<sup>-1</sup></i> )       | 0.0000   | 0.0000  | 0.0000    | 0.0000  | 0.0000  |
| Full-bearing age RT ( <i>years</i> )                      | 0.0001   | 0.0000  | 0.0000    | 0.0001  | 0.0002  |
| Full-bearing age IT ( <i>years</i> )                      | 0.0000   | 0.0000  | 0.0000    | 0.0000  | 0.0000  |
| Full-bearing age RI ( <i>years</i> )                      | 0.0002   | 0.0000  | 0.0000    | 0.0002  | 0.0002  |
| Full-bearing age II ( <i>years</i> )                      | 0.0000   | 0.0000  | 0.0000    | 0.0000  | 0.0000  |
| Full-bearing age RHD ( <i>years</i> )                     | 0.0000   | 0.0000  | 0.0000    | 0.0000  | 0.0000  |
| Full-bearing age IHD ( <i>years</i> )                     | 0.0000   | 0.0000  | 0.0000    | 0.0000  | 0.0000  |
| Yield Potential RT ( <i>ton ha<sup>-1</sup></i> )         | 0.0014   | 0.0000  | 0.0001    | 0.0013  | 0.0016  |
| Yield Potential IT ( <i>ton ha<sup>-1</sup></i> )         | 0.0005   | 0.0000  | 0.0000    | 0.0004  | 0.0005  |
| Yield Potential RI ( <i>ton ha<sup>-1</sup></i> )         | 0.0008   | 0.0000  | 0.0000    | 0.0007  | 0.0009  |
| Yield Potential II ( <i>ton ha<sup>-1</sup></i> )         | 0.0003   | 0.0000  | 0.0000    | 0.0002  | 0.0003  |
| Yield Potential RHD ( <i>ton ha<sup>-1</sup></i> )        | 0.0002   | 0.0000  | 0.0000    | 0.0001  | 0.0002  |
| Yield Potential IHD ( <i>ton ha<sup>-1</sup></i> )        | 0.0001   | 0.0000  | 0.0000    | 0.0000  | 0.0001  |

Cropping systems are rainfed-traditional (RT), irrigated-traditional (IT), rainfed-intensive (RI), irrigated-intensive (II), rainfed-high-density (RHD) and irrigated-high-density (IHD)
